# Supplementary material for: TGFβ Impairs HNF1α Functional Activity in Epithelial-to-Mesenchymal Transition Interfering With the Recruitment of CBP/p300 Acetyltransferases
Source: PubMed Central journal article supplement (PMC6728925; doi:10.3389/fphar.2019.00942), 2019-08-30
Supplement: DataSheet_1.pdf [file DataSheet_1.pdf]

## Supplementary Information

### Supplementary Figure Legend

**Supplementary Figure S1.** (A) Analysis of constitutively expressed HNF1 $\alpha$  activity in Ras-transformed hepatocytes following TGF $\beta$  treatment. RT-qPCR analysis for the indicated genes in Ras-transformed hepatocytes transfected with pLCPX-HNF1 $\alpha$ <sup>Myc</sup> (HNF1) or the empty vector (CTR), treated with 5ng/ml TGF $\beta$  or left untreated (NT). qPCR data, obtained in triplicate and normalized to the housekeeping gene RPL34, are expressed as relative gene expression. Mean  $\pm$  S.E.M of three independent experiments is shown. Statistically significant differences are reported (\*p-value <0.05; \*\*p-value <0.01; ns=not significant). (B) Western Blot analysis of HNF1 $\alpha$  protein in cell extracts from one of the experiments shown in (A). CDK4 was used as loading control.

**Supplementary Table 1. List of mouse primers used for RT-qPCR experiments.**

| <b>Gene</b>                    | <b>Forward primer</b>       | <b>Reverse primer</b>       |
|--------------------------------|-----------------------------|-----------------------------|
| <i>HNF4<math>\alpha</math></i> | 5'-TCTTCTTTGATCCAGATGCC-3'  | 5'-GGTCGTTGATGTAATCCTCC-3'  |
| <i>HNF1<math>\alpha</math></i> | 5'-TATCATGGCCTCGCTACCTG-3'  | 5'-ACTCCCCATGCTGTTGATGA-3'  |
| <i>TTR</i>                     | 5'-CCATGAATTCGCGGATGTGG-3'  | 5'-TCAATTCTGGGGGTTGCTGA-3'  |
| <i>Albumin</i>                 | 5'-TTCCTGGGCACGTTCTTGTA-3'  | 5'-GCAGCACTTTTCCAGAGTGG-3'  |
| <i>18S</i>                     | 5'-ACGACCCATTTCGAACGTCTG-3' | 5'-GCACGGCGACTACCATCG-3'    |
| <i>RPL34</i>                   | 5'-GGAGCCCCATCCAGACTC-3'    | 5'-CGCTGGATATGGCTTTCCTA -3' |

**Supplementary Table 2. List of mouse primers used for qPCR in ChIP experiments.**

| <b>Promoter</b>                | <b>Forward primer</b>       | <b>Reverse primer</b>       |
|--------------------------------|-----------------------------|-----------------------------|
| <i>Albumin</i>                 | 5'-AGGAACCAATGAAATGCGAGG-3' | 5'-AGACGAAGAGGAGGAGGAGA-3'  |
| <i>HNF4<math>\alpha</math></i> | 5'-ACTTGGGCTCCATAGCAAGA-3'  | 5'-CAGGACAGGCACAGACAAGA-3'  |
| <i>Neurogl</i>                 | 5'-CCTCCCGCGAGCATAAATTA-3'  | 5'-GCGATCAGATCAGCTCCTGT -3' |
| <i>RPL30</i>                   | 5'-TAAGGCAGGAAGATGGTGG -3'  | 5'-CAGTGTGCTCAAATCTATCC-3'  |
